# Supplementary material for: Influence of exogenous growth hormone administration on circulating concentrations of α-klotho in healthy and chronic kidney disease subjects: a prospective, single-center open case-control pilot study
Source: BMC Nephrol. 2018 Nov 15;19:327. doi: 10.1186/s12882-018-1114-z (PMC6238285; doi:10.1186/s12882-018-1114-z)
Supplement: Supplementary file 1 — S1 Final fulle database K&G study. This database contains the datasets used and/or analysed during the current study. (XLS 80 kb) [file 12882_2018_1114_MOESM1_ESM.xls]

## Sheet: S1 Final full database K&G stu
Pt_nr	Pt_type	Geslacht	Geboortedatum	Ras	Rokenjn	RokenEHdag	Alcoholjn	AlcoholEHweek	Hypertensie	Cardiovasculardisease	Peripheralvasculardisease	Polyneuropathie	Other	Cause_renal_failure	MedicatieAceiARBs	MedicatieBetablockers	MedicatieCalciumchannelblockers	MedicatieDiuretics	MedicatiePhosphatebinding	MedicatieVitamineD	MedicatieActivevitamineD	MedicatieOthers	DoseringSomatropinemgdag	Aantaldagentoegediend	Eindpuntstudie	Datumdropout	Studienummer.1	Studienummer.2	Studienummer.3	Studienummer.4	Visitenummer.1	Visitenummer.2	Visitenummer.3	Visitenummer.4	Visitedatum.1	Visitedatum.2	Visitedatum.3	Visitedatum.4	Lengtecm.1	Lengtecm.2	Lengtecm.3	Lengtecm.4	RRsys1mmHg.1	RRsys1mmHg.2	RRsys1mmHg.3	RRsys1mmHg.4	RRdias1mmHg.1	RRdias1mmHg.2	RRdias1mmHg.3
1	1	1	1966-01-01	1	0	-8	1	8	1	0	0	0	0	5	1	0	0	0	0	0	0	1	1.35	7	1	-8	P01	P01	P01	P01	1	2	4	5	2015-01-28	2015-02-10	2015-02-24	2015-03-03	179	-99	-99	-99	131	131	127	126	79	82	67
2	1	1	1956-01-01	1	0	-8	1	4	1	0	0	0	0	5	1	1	0	0	0	0	0	1	1.35	7	1	-8	P02	p02	P02	P02	1	2	4	5	2015-02-26	2015-03-09	2015-03-16	2015-03-24	178	-99	-99	-99	151	134	125	143	88	75	73
3	1	1	1957-01-01	1	0	-8	1	7	1	0	0	0	0	5	1	1	0	1	0	0	0	1	1.65	7	1	-8	P03	P03	P03	P03	1	2	4	5	2015-02-26	2015-03-10	2015-03-17	2015-03-24	180	-99	-99	-99	181	144	154	178	101	86	84
4	1	2	1977-01-01	1	0	-8	0	-8	1	0	0	0	0	2	0	1	0	0	0	0	0	1	1.2	7	1	-8	P04	P04	P04	P04	1	2	4	5	2015-04-09	2015-05-11	2015-05-19	2015-05-26	170	-99	-99	-99	144	137	136	139	90	90	88
5	1	1	1958-01-01	1	0	-8	0	-8	0	0	0	0	1	3	0	0	0	0	0	0	0	1	1.65	6	1	-8	P05	P05	P05	P05	1	2	4	5	2015-04-09	2015-07-31	2015-08-11	2015-08-18	175	-99	-99	-99	130	142	130	130	80	78	83
6	1	2	1990-01-01	1	0	-8	1	1	0	0	0	0	0	2	1	0	0	0	0	1	0	1	1.2	6	1	-8	P06	P06	P06	P06	1	2	4	5	2015-05-12	2015-06-01	2015-06-08	2015-06-15	168	-99	-99	-99	117	109	124	128	88	65	70
7	1	1	1951-01-01	1	0	-8	1	2	0	0	0	0	1	3	1	0	0	1	0	1	1	1	1.65	5	218	218	P07	P07	P07	P07	1	2	4	5	2015-05-12	2015-05-15	218	2015-05-27	178	-99	218	-99	136	125	218	147	88	77	218
8	1	2	1981-01-01	1	1	20	1	3	1	0	0	0	1	4	0	0	1	0	0	0	0	1	1.2	7	1	-8	P08	P08	P08	P08	1	2	4	5	2015-08-11	2015-08-11	2015-08-18	2015-08-25	169	-99	-99	-99	158	158	133	137	101	101	85
9	1	1	1960-01-01	1	0	-8	1	1	0	0	0	0	1	5	0	0	0	0	0	0	0	1	1.5	7	1	-8	P09	P09	P09	P09	1	2	4	5	2015-08-20	2015-08-20	2015-08-27	2015-09-04	173	173	-99	-99	141	141	143	160	94	94	92
10	2	1	1962-01-01	1	0	-8	1	7	1	0	0	0	0	6	1	0	0	0	0	0	0	1	1.8	7	1	-8	C01	C01	C01	C01	1	2	4	5	2015-04-09	2015-04-16	2015-04-23	2015-04-30	185	-99	-99	-99	141	135	148	147	86	86	86
11	2	1	1963-01-01	1	0	-8	1	2	0	0	0	0	0	6	0	0	0	0	0	0	0	0	1.65	7	1	-8	C02	C02	C02	C02	1	2	4	5	2015-06-02	2015-06-22	2015-06-29	2015-07-06	175	-99	-99	-99	136	140	148	137	79	83	77
12	2	1	1965-01-01	1	0	-8	1	4	0	0	0	0	1	6	0	0	0	0	0	0	0	1	1.65	6.5	2	218	C03	C03	C03	C03	1	2	4	5	2015-06-01	2015-06-03	2015-06-10	2015-06-17	194	-99	-99	-99	135	140	142	146	75	77	80
13	2	2	1979-01-01	1	0	-8	1	8	0	0	0	0	0	6	0	0	0	0	0	0	0	1	1.65	7	1	-8	C04	C04	C04	C04	1	2	4	5	2015-06-01	2015-07-15	2015-07-22	2015-07-29	171	-99	-99	-99	116	131	123	133	69	75	72
14	2	1	1961-01-01	1	0	-8	1	2	0	0	0	0	0	6	0	0	0	0	0	0	0	0	1.5	7	1	-8	C05	C05	C05	C05	1	2	3	4	2016-02-02	2016-02-04	2016-02-11	2016-02-18	171	-99	-99	-99	135	134	118	135	75	79	65
15	2	2	1990-01-01	1	0	-8	1	3	0	0	0	0	0	6	0	0	0	0	0	0	0	1	1.35	7	1	-8	C06	C06	C06	C06	1	2	4	5	2015-08-11	2015-08-19	2015-08-26	2015-09-02	172	-99	-99	-99	123	119	115	120	67	71	65
16	2	2	1982-01-01	1	0	-8	1	4	0	0	0	0	0	6	0	0	0	0	0	0	0	1	1.35	7	1	-8	C08	C08	C08	C08	1	2	4	5	2015-08-06	2015-08-14	2015-08-21	2015-08-27	179	-99	-99	-99	131	137	117	121	85	73	73
17	2	1	1965-01-01	1	0	-8	1	4	0	0	0	0	1	6	0	0	0	0	0	0	0	1	1.65	7	1	-8	C09	C09	C09	C09	1	2	4	5	2016-02-10	2016-02-10	2016-02-18	2016-02-26	-99	194	-99	-99	-99	148	143	153	-99	84	81
18	2	1	1964-01-01	1	0	-8	1	5	0	0	0	0	1	6	0	0	0	0	0	0	0	1	1.5	7	1	-8	C10	C10	C10	C10	1	2	3	4	2015-07-30	2015-08-07	2015-08-14	2015-08-21	177	-99	-99	-99	133	130	127	129	83	82	75
[truncated: 166 more columns]
